# Supplementary material for: Comparing Circulating Tumor Cell Counts with Dynamic Tumor Size Changes as Predictor of Overall Survival: A Quantitative Modeling Framework
Source: Oxford University Press journal article supplement (doi:10.1158/1078-0432.ccr-19-2570), 2020-06-11
Supplement: 10780432ccr192570-sup-226792_5_supp_6310896_qsp8fj.docx [file 10780432ccr192570-sup-226792_5_supp_6310896_qsp8fj.docx]

| 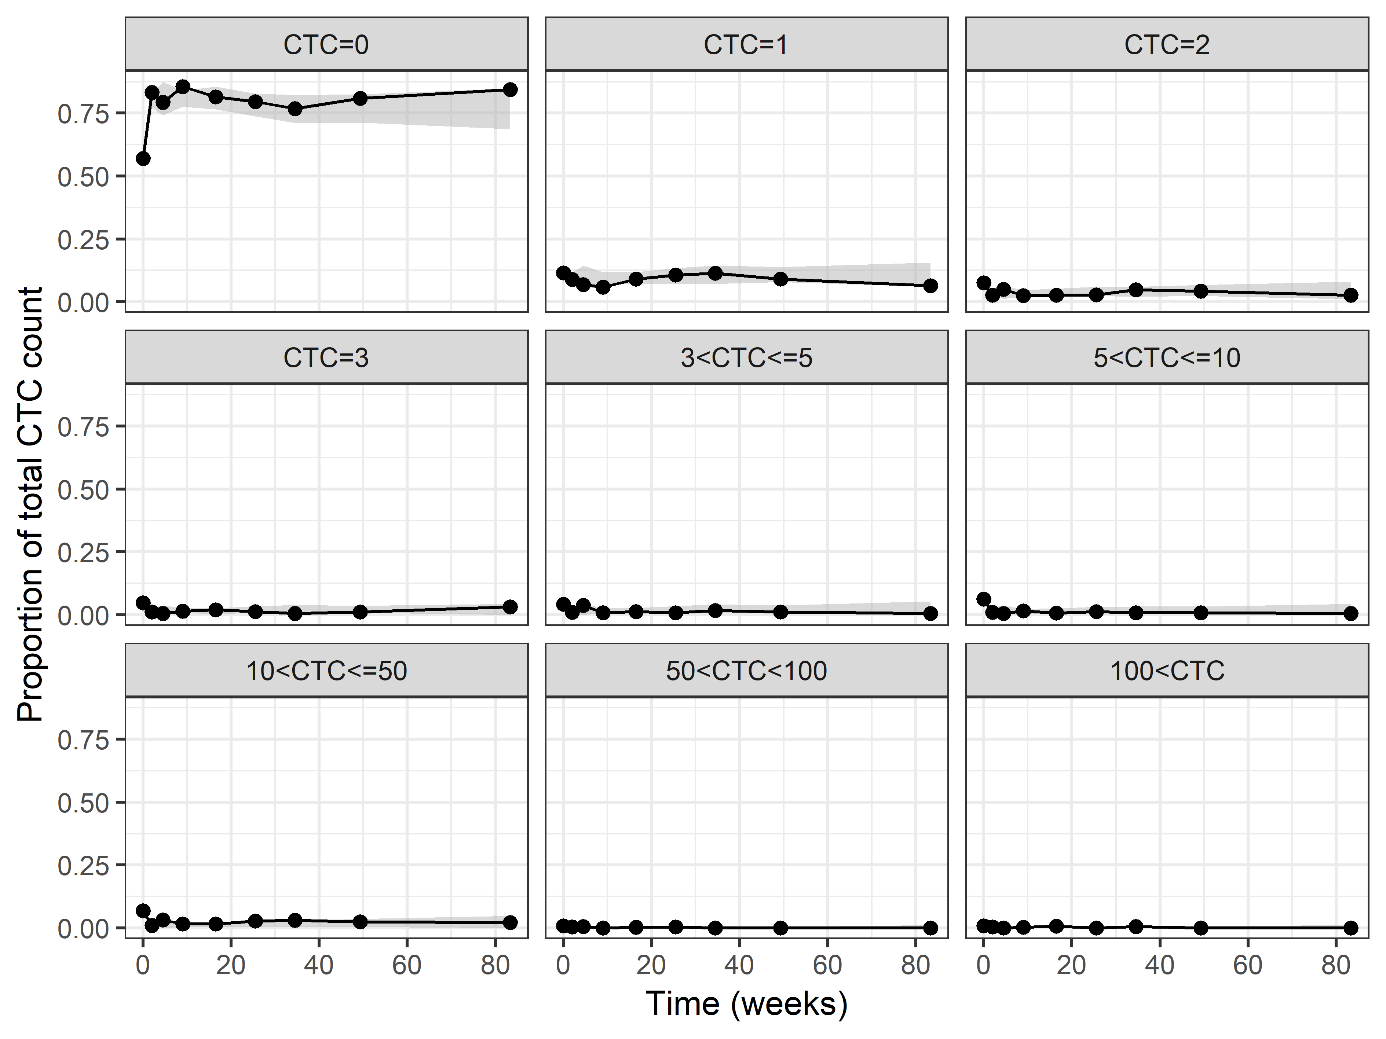 |
| --- |
| **Supplementary Figure 5**  VPC of the proportions of CTC count equal to 0, 1, 2, 3, >3 and ≤5, >5 and ≤10, >10 and ≤50, >500 and ≤100 and >100 over time in the final CTC model. The dots represent the observed proportions (connected with a line) and the shaded areas are the 95% CI of the simulated data, derived from 200 simulations from the final CTC model. |
