# Supplementary material for: Comparing Circulating Tumor Cell Counts with Dynamic Tumor Size Changes as Predictor of Overall Survival: A Quantitative Modeling Framework
Source: Oxford University Press journal article supplement (doi:10.1158/1078-0432.ccr-19-2570), 2020-06-11
Supplement: 10780432ccr192570-sup-226792_5_supp_6310897_qkp8fj.docx [file 10780432ccr192570-sup-226792_5_supp_6310897_qkp8fj.docx]

| 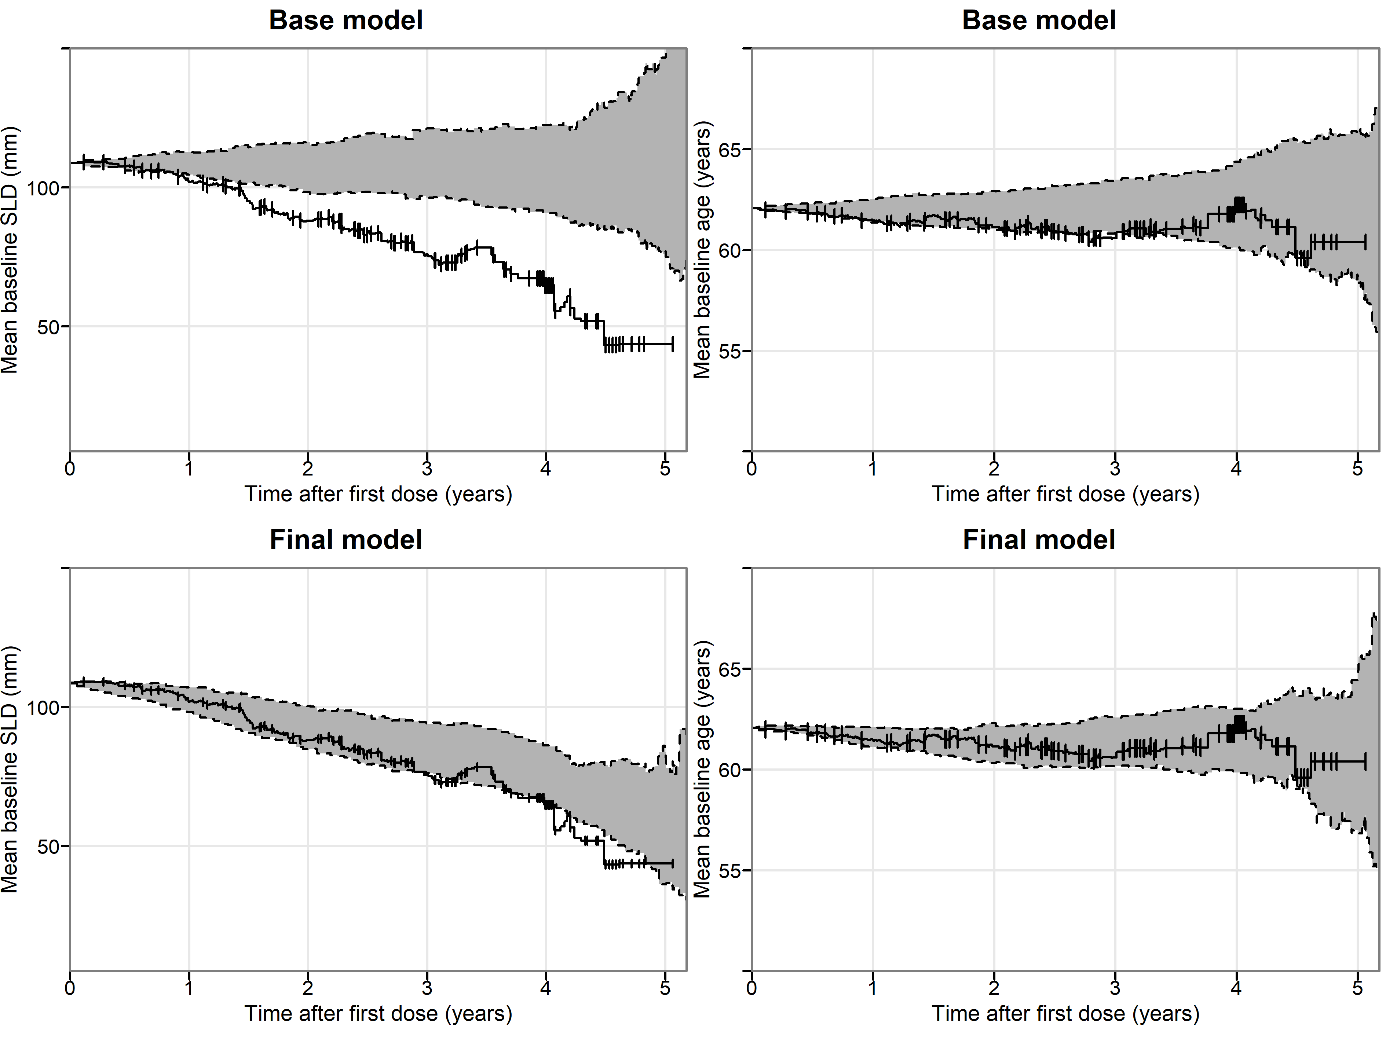 |
| --- |
| **Supplementary Figure 6**  KMMC VPCs of the base (top plots) and final (bottom plots) OS model. The observed mean BTS and age (black lines), in comparison to the 95% CI based on 100 simulations from the base and final models (shaded areas), of patients remaining in the study over time are illustrated in the left and right plots, respectively. Vertical lines indicate censored events. |
