# Supplementary material for: Comparing Circulating Tumor Cell Counts with Dynamic Tumor Size Changes as Predictor of Overall Survival: A Quantitative Modeling Framework
Source: Oxford University Press journal article supplement (doi:10.1158/1078-0432.ccr-19-2570), 2020-06-11
Supplement: 10780432ccr192570-sup-226792_5_supp_6310899_qnp8fj.docx [file 10780432ccr192570-sup-226792_5_supp_6310899_qnp8fj.docx]

| **Supplementary Table 1** Baseline characteristics of the 451 patients included in the analysis data set | | |
| --- | --- | --- |
| **Continuous** | | **Median (range)** |
| Tumor size (mm) | | 86 (10-494) |
| CTC count | | 0 (0-351) |
| Age (years) | | 63 (28-84) |
| **Categorical** | | **Number of patients (%)** |
| Arm | |  |
|  | Chemotherapy and bevacizumab | 228 (51) |
|  | Chemotherapy and bevacizumab and cetuximab | 223 (49) |
| Lactate dehydrogenase | |  |
|  | Normal | 258 (57) |
|  | Increased | 191 (42) |
|  | Missing | 2 (0) |
| Prior chemotherapy | |  |
|  | Yes | 57 (13) |
|  | No | 394 (87) |
| Resection of primary tumor | |  |
|  | Yes | 340 (75) |
|  | No | 104 (23) |
|  | Missing | 7 (2) |
