# Supplementary material for: Comparing Circulating Tumor Cell Counts with Dynamic Tumor Size Changes as Predictor of Overall Survival: A Quantitative Modeling Framework
Source: Oxford University Press journal article supplement (doi:10.1158/1078-0432.ccr-19-2570), 2020-06-11
Supplement: 10780432ccr192570-sup-226792_5_supp_6310900_q1p8fj.docx [file 10780432ccr192570-sup-226792_5_supp_6310900_q1p8fj.docx]

| **Supplementary Table 2** ΔOFV for the explored drop-out predictors in the first step | |
| --- | --- |
| **Predictor** | **ΔOFV** |
| Progressive disease1 | 505 |
| Normalized baseline tumor size | 203 |
| Relative change from baseline tumor time-course | 9.09 |
| Time | 125 |
| 120% and at least 5 mm increase in tumor size | |
